# 1 **Adaptive value of circadian rhythms in High Arctic Svalbard ptarmigan**

2

3 Daniel Appenroth<sup>1</sup>, Gabriela C. Wagner<sup>1,2</sup>, David G. Hazlerigg<sup>1,\*</sup> and Alexander C. West<sup>1,3,\*</sup>

4

5 <sup>1</sup> Arctic Chronobiology and Physiology, University of Tromsø, Framstredet 42, 9019 Tromsø, Norway

6 <sup>2</sup>Divisjon for skog og utmark, NIBIO, Holtveien 66, 9016 Tromsø, Norway

7 <sup>3</sup>Lead contact

8 \*Correspondence: [alexander.west@uit.no](mailto:alexander.west@uit.no) or [david.hazlerigg@uit.no](mailto:david.hazlerigg@uit.no)

9

10

## 11 **SUMMARY**

12 The arctic archipelago of Svalbard (74 to 81° North) experiences extended periods of uninterrupted  
13 daylight in summer and uninterrupted darkness in winter. Species native to Svalbard display no daily  
14 rhythms in behaviour or physiology during these seasons, leading to the view that circadian rhythms  
15 may be redundant in arctic environments [1, 2]. Nevertheless, seasonal changes in the physiology and  
16 behaviour of arctic species rely on photoperiodic synchronisation to the solar year. Since this  
17 phenomenon is generally circadian-based in temperate species, we investigated if this might be a  
18 preserved aspect of arctic temporal organisation.

19 Here, we demonstrate the involvement of the circadian clock in the seasonal photoperiodic response  
20 of the Svalbard ptarmigan (*Lagopus muta hyperborea*), the world's northernmost resident bird species.  
21 First, we show the persistence of rhythmic clock gene expression under constant conditions within the  
22 mediobasal hypothalamus and pars tuberalis, the key tissues in the seasonal neuroendocrine cascade.  
23 We then employ a “sliding skeleton photoperiod” protocol, revealing that the driving force behind  
24 seasonal biology of the Svalbard ptarmigan is rhythmic sensitivity to light, a feature that depends on a  
25 functioning circadian rhythm. Our results suggest that the unusual selective pressure of the Arctic  
26 relaxes the adaptive value of the circadian clock for organisation of daily activity patterns, whilst  
27 preserving its importance for seasonal synchronisation. Thus, our data simultaneously reconnects  
28 circadian rhythms to life in the Arctic and establishes a universal principle of evolutionary value for  
29 circadian rhythms in seasonal biology.

30

31 **Keywords:** Photoperiodism, Circadian, Seasonal reproduction, Pars tuberalis, Svalbard ptarmigan, the  
32 Arctic

## 33 RESULTS AND DISCUSSION

34

### 35 The rhythmic expression of circadian clock genes in the mediobasal hypothalamus and pars 36 tuberalis of Svalbard ptarmigan persists under constant light

37 Svalbard ptarmigan (Figure 1A) show diurnal behaviour patterns under daily light-dark cycles, but are  
38 behaviourally arrhythmic in constant light conditions (Figure 1B) [1, 3]. These data, and similar findings  
39 in Svalbard reindeer [2, 4], suggest that circadian rhythms are redundant in the high arctic habitat of  
40 Svalbard. The Svalbard ptarmigan, however, uses photoperiod to time seasonal changes in its  
41 physiology [3, 5-7], and a vast collection of data supports the role of the circadian rhythm in  
42 photoperiodic timekeeping [8-17]. Thus, although the ptarmigan circadian rhythm may not be required  
43 for maintaining daily synchrony, it may play an essential role in photoperiodic responses.

44 We first used radioactive *in situ* hybridization to examine the transcriptional regulation of circadian  
45 genes *Cry1* and *Per2* within the mediobasal hypothalamus (MBH) and pars tuberalis (PT) of the  
46 pituitary gland, since these sites control the seasonal neuroendocrine response in other  
47 gallinaceous species [18-20]. Our results showed that both genes were strongly rhythmic under short  
48 photoperiod (SP, L6:D18) and displayed negligible changes in their expression patterns following  
49 transfer to constant light (LL) (Figure 1C and 1D). Hence, core elements of the avian circadian clock  
50 show persistent endogenous rhythmicity in key photoperiodic response tissues.

51 In temperate and tropical bird species [18-23] the seasonal reproductive response depends on  
52 photoperiodic control of thyrotropin beta subunit (*Tshβ*) expression in the PT and consequent  
53 thyrotropin receptor-mediated changes in MBH function, exemplified by changes in the expression of  
54 the thyroid hormone deiodinase genes, *Dio2* and *Dio3*. In the Svalbard ptarmigan *Tshβ* expression in  
55 the PT was continuously suppressed under SP, and transfer to LL strongly induced *Tshβ* expression,  
56 which peaked 13 h after lights-on (CT13) ( $p < 0.0001$  compared to SP control birds by Sidak's *post hoc*  
57 test) (Figure 1E) before falling back to SP levels by 23 h after lights-on (CT23). Within the MBH, transfer  
58 to LL significantly induced the expression of *Dio2* by CT23 ( $p = 0.0011$  by Sidak's *post hoc* test), and  
59 suppressed the expression of *Dio3* by CT18 ( $p = 0.0085$  by Sidak's *post hoc* test) (Figure 1E). These data  
60 show that the temporal dynamics of the "first long day" photoperiodic neuroendocrine response is  
61 highly conserved between Svalbard ptarmigan and their relatives from temperate latitudes, i.e.  
62 Japanese quail (*Coturnix japonica*) [18].

63

### 64 A sliding skeleton photoperiod triggers the long-day seasonal response in Svalbard ptarmigan

65 In 1936, Erwin Bünning proposed that photoperiodic sensitivity depends on a circadian rhythm in light  
66 sensitivity [24]. A wealth of data supports this hypothesis, confirming that short light-pulses given  
67 during a so-called 'photoinducible phase' are sufficient to drive long-day seasonal response [8-14]. In  
68 other words, it is not the cumulative duration of light exposure that triggers a long-day response, but  
69 the coincidence of light with an endogenously defined circadian phase.

70 To test the involvement of circadian rhythms in photoperiodic sensitivity of Svalbard ptarmigan, we  
71 exposed our birds to either extended SP, an increasing continuous photoperiod (IP) or a sliding  
72 skeleton photoperiod (SkP). The SkP-group mimics the extending range of the IP-group, but maintains  
73 the same cumulative hours of light in a 24-h period as in the SP-group (Figure 2A). Expression of a long-  
74 day phenotype in the SkP would therefore demonstrate a circadian rhythm in photoperiodic sensitivity  
75 in Svalbard ptarmigan. To track the development of a long-day phenotype we monitored activity, body  
76 mass, food intake and plasma testosterone; variables that are all under photoperiodic control in  
77 Svalbard ptarmigan [5-7, 25].

78 We observed a strong diurnal activity preference within all the groups (Figure 2A). The activity profile  
79 of the SP-group went unchanged throughout the entire experiment; however, both the IP and SkP  
80 groups increased their activity between weeks 5 and 7 (Figure 2B) ( $p < 0.05$  for all IP vs SP and SkP vs  
81 SP between week 5 and 7 by Tukey's *post hoc* test). Whereas the activity increase in the IP-group within  
82 this period was proportional to the increased hours of light, the activity of the SkP-group showed a  
83 marked 3-fold increase in intensity within the restricted light-hours ( $p < 0.05$  for all SkP vs SP and SkP  
84 vs IP in week 7 by Tukey's *post hoc* test) (Figure 2C), indicating a photoperiodic stimulation of activity.

85 Associated with these increases in activity, we observed sustained declines in body mass in both the  
86 SkP and IP groups continuing until weeks 9 and 11 respectively (Figure 2D). Food intake was similar  
87 between all three groups until week 10 (Figure S1B), suggesting that these responses were a  
88 consequence of increased activity resulting in a negative energy balance. Longitudinal assessment of  
89 plasma testosterone in male birds showed a clear stimulation in week 10 in the IP-group ( $p < 0.0001$   
90 for IP vs SP and IP vs SkP by Tukey's *post hoc* test) (Figure 2E), but no statistically significant changes in  
91 the other two groups. Hence the intensification of activity in SkP birds and in IP birds prior to week 10  
92 is not a secondary consequence of gonadal changes, but probably reflects photoperiodic induction of  
93 pre-breeding territorial behaviour [26, 27]

94 While the activity level of the IP-group continued to rise throughout the experiment, with maximal  
95 activity once the birds experienced LL, the activity of the SkP-group reduced after week 7, returning to  
96 SP levels by week 10 ( $p > 0.05$  for SkP vs SP at all points from week 10 onwards by Tukey's *post hoc*  
97 test, Figure 2B and 2C). The reversal of the response in SkP- but not IP-birds probably reflects either a

98 movement of the secondary 2-h block of light beyond the photosensitive phase or a “phase jump” in  
99 the entrainment of the circadian rhythm, so that the extended dark interval following the 4-h light-  
100 block re-aligns from subjective day to subjective night [28]. Whichever scenario applies, the birds  
101 behaved as if experiencing a declining photoperiod after week 7 even though cumulative daily light  
102 exposure remained constant. Overall, these results suggest that the Svalbard ptarmigan use a  
103 circadian-based system to mediate spring photoperiodic induction of pre-breeding behaviour, with a  
104 photoinducible phase some 14 to 16 h after dawn (ZT 14-16).

105

### 106 **A sliding skeleton photoperiod triggers the long-day photoperiodic neuroendocrine cascade in** 107 **Svalbard ptarmigan**

108 SkP shows a strong photo-stimulatory effect at week 6 where the second (2-h) light-period falls 14 h  
109 after the start of the first light-period. We performed a second experiment to determine if these  
110 behavioural and physiological responses correspond to classical photoperiodic regulation of the  
111 molecular neuroendocrine cascade within the PT/ MBH region. We compared Svalbard ptarmigan  
112 under SP to a SkP in which from week 6 onwards the 2-h block of light was held at 14 to 16 h after the  
113 start of the 4-h block of light, i.e. to coincide with the photoinducible phase inferred from the previous  
114 experiment (Figure 3A). Longitudinal measurements of activity, body mass, food intake and  
115 testosterone, were consistent with our previous experiment, and showed a persistent impact of the  
116 ZT 14-16 light-period on the development of a summer phenotype (Figure S2). The SkP-group shows  
117 increased expression of *Dio2* ( $p = 0.0024$  by unpaired t-test) and decreased expression of *Dio3* ( $p =$   
118  $0.0011$  by unpaired t-test) (Figure 3B). This indicates that through light-stimulation of the  
119 photoinducible phase we were able to elicit the classically described changes in MBH thyroid hormone  
120 metabolism in our experimental birds. This cements the role of the circadian clock in photoperiodic  
121 sensitivity in the Svalbard ptarmigan. Radioactive *in situ* hybridization analysis for *Tsh $\beta$*  showed no  
122 change between treatments ( $p = 0.2589$  by unpaired t-test). The low *Tsh $\beta$*  expression in the SkP-group  
123 is most likely due to the sampling of the birds at ZT 0.5-1.5 which is comparable with the early light-  
124 period in our “first long day” experiment, when *Tsh $\beta$*  expression is low (Figure 1E). This data  
125 additionally suggest comparable circadian phase between the SP and SkP groups.

126

### 127 **Adaptive value of circadian rhythms in the Arctic**

128 Overall, our results affirm the universal adaptive role of the circadian rhythm for photoperiodic time  
129 measurement. We show that an organism in which daily behavioural rhythms disappear under the

130 midnight sun and during the polar night, maintains a rhythmic molecular clock in tissues essential for  
131 seasonal timing and employs a circadian rhythm to set a photoinducible circadian phase.

132 The unusual phenotypes of the Svalbard ptarmigan and Svalbard reindeer, which shows a similar  
133 circadian phenotype [2, 4, 29, 30], reflect the unusual selective pressures of their habitat. Summer and  
134 winter on Svalbard provide two wildly contrasting environments for which seasonal synchronisation is  
135 essential, particularly of reproductive physiology. Conversely, the daily amplitude of irradiance and  
136 temperature are greatly reduced on Svalbard compared to lower latitudes, thus the adaptive value of  
137 daily behavioural organisation on Svalbard is likely to be weak, and may even exert counter-adaptive  
138 constraints on exploitation of the polar summer (Figure 4). Nevertheless, several reports of sustained  
139 circadian behaviour and physiology in other arctic dwellers have emerged, e.g. Arctic ground squirrels  
140 [31, 32], bumblebees [33], polar bears [34], copepods [35] and several migrating birds [36-38].  
141 Collectively, these studies suggest that species-specific differences in circadian outputs should be seen  
142 as flexible solutions to complex life-history constraints [39]. For the Svalbard ptarmigan, the adaptive  
143 solution is to maintain a circadian rhythm to measure photoperiod, but decouple behavioural drive as  
144 a circadian output.

145

#### 146 **ACKNOWLEDGMENTS**

147 We thank the animal technicians from the Arctic Chronobiology and Physiology research group: Hans  
148 Lian, Hans-Arne Solvang and Renate Thorvaldsen. Their experience and dedication is indispensable to  
149 our research. We would also like to thank Vebjørn J. Melum for his help with animal husbandry and  
150 Hugues Dardente for his help with the *in situ* hybridizations.

151

#### 152 **AUTHOR CONTRIBUTION**

153 Conceptualization, all; Methodology, all; Validation DA & GCW,; Formal analysis, DA & ACW;  
154 Investigation, all; Resources, GCW & DGH; Data curation, DA; Writing – Original draft, DA & ACW;  
155 Writing Review & Editing, DA, DGH & ACW; Visualization, DA, GCW & ACW; Supervision, DGH, GCW &  
156 ACW; Project Administration, all; Funding Acquisition, DGH;

157

#### 158 **DECLARATION OF INTERESTS**

159 The authors declare no competing interests.

160

161 **FIGURE LEGENDS**

162

163 **Figure 1. Persistence of circadian rhythmicity in the pars tuberalis and mediobasal hypothalamus of**  
164 **Svalbard ptarmigan**

165 (A) Svalbard ptarmigan in different plumages. On the right a male in white winter plumage and on the  
166 left a female in brown summer plumage (© Ida-Helene Sivertsen).

167 (B) Double plotted actogram of a Svalbard ptarmigan in Svalbard over one year (March to February).  
168 Thick lines indicate on- and offset of civil twilight and thin lines indicate sunrise and sunset. Redrawn  
169 using data from Reierth *et al.* (1998) [1].

170 (C) Experimental design. Birds entrained to SP (6L:18D) either remained in SP or were transferred  
171 directly into LL. Samplings are indicated by arrows and are given in Zeitgeber time (ZT) or circadian  
172 time for the LL-group (CT). Both groups were sampled at ZT/ CT 8, 13, 18 and 23. The SP-group was  
173 additionally sampled at ZT 3 (ZT 3 was used as initial point for plotting both group, but was omitted  
174 from statistical analysis).

175 (D) Gene expression for *Per2* and *Cry1* in the MBH and PT between the SP- (dashed line) and LL-group  
176 (solid line). Data is displayed as mean optical densities (OD)  $\pm$  SEM. Asterisks indicate significant  
177 differences between the groups at a given ZT/ CT ( $p < 0.05$  by by Sidak's *post hoc* test).

178 (E) Gene expression for *Tsh $\beta$* , *Dio2* and *Dio3* in the PT and MBH between the SP- (dashed line) and LL-  
179 group (solid line). Gene expression was measured by radioactive *in situ* hybridization and is displayed  
180 as mean OD  $\pm$  SEM. Asterisks indicate significant differences between the groups at a given ZT/ CT ( $p$   
181  $< 0.05$  by by Sidak's *post hoc* test).

182

183 **Figure 2. Physiological and endocrine responses to increasing photoperiod and a sliding skeleton**  
184 **photoperiod**

185 (A) Experimental design. All bird were initially transferred from DD to SP (6L:18D), which marked the  
186 start of the experiment. Birds of the SP-group remained under SP for 12 weeks. Birds of the IP-group  
187 were subjected to a stepwise increase in photoperiod by extending the lights-off signal by two hours  
188 every week. The light-period of the SkP-group was split into two blocks of light at week 2. The long 4-  
189 h light-period remained static while the 2-h light-period shifted forwards weekly by two hours. By week  
190 10 the light-period merged again at which point the birds were back to SP but shifted forward by two

191 hours. Representative single-plotted actograms are displayed next to photoperiodic treatments. Grey  
192 shading in the actograms indicate periods of darkness.

193 (B) Activity profiles for each group measured as count/day and displayed as means  $\pm$  SEM.

194 (C) Activity profiles presented as counts/ day divided by the hours of light. Data is displayed as means  
195  $\pm$  SEM.

196 (C) Changes in body mass measured as grams gained or lost from one week to another. Data is  
197 presented as means  $\pm$  SEM

198 (D) Plasma testosterone of male birds measured as ng/ml and displayed as means  $\pm$  SEM.

199

### 200 **Figure 3. Response of photo-induced genes in the PT and MBH to a skeleton photoperiod**

201 (A) Experimental design. Birds entrained to SP (6L:18D) either remained in SP for 8 weeks or  
202 experienced a shifting skeleton photoperiod. The light-period of the SkP-group was split into a 4-h and  
203 a 2-h light-period in week 2. The 2-h light-period was weekly shifted backward by two hours until week  
204 6 at which point the light-period remained at ZT 14-16 for three weeks. All birds were sampled in week  
205 8 at ZT 0.5-1.5. Representative single-plotted actograms are displayed next to photoperiodic  
206 treatment. Grey shading in the actograms indicate periods of darkness.

207 (B) Gene expression of *Tsh $\beta$* , *Dio2* and *Dio3* in the PT and MBH, measured by *in situ* hybridization. Data  
208 is presented as mean optical densities (OD)  $\pm$  SEM and asterisks indicate significant differences  
209 between the groups ( $p < 0.05$  by unpaired t-test). Representative radiographs are displayed under the  
210 respective gene and group.

211

### 212 **Figure 4. Adaptation of the circadian system to the Arctic**

213 The Japanese Quail (left panel) uses its circadian system to control activity, as it retains a free running  
214 rhythm in prolonged constant darkness (DD) [40, 41]. The circadian system is also employed for  
215 photoperiodic time measurement. This is supported by studies using skeleton photoperiods that  
216 trigger long day responses, e.g. developing gonads, when the second light-period coincides with the  
217 photoinducible phase [10, 19, 42, 43]. We show here that its arctic relative, the Svalbard ptarmigan  
218 (right panel), retained its circadian system to sustain a rhythm of photosensitivity and responds to a  
219 correctly timed skeleton photoperiod in the same manner as the quail does. However, due to its high  
220 latitudinal environment and the special photic conditions of Svalbard we propose that the functional  
221 circadian system exhibits weak or no control over behavioural output.

222 STAR★METHODS

223 KEY RESOURCES TABLE

| REAGENT or RESOURCE                                                                                | SOURCE                 | IDENTIFIER                                                                                      |
|----------------------------------------------------------------------------------------------------|------------------------|-------------------------------------------------------------------------------------------------|
| <b>Chemicals, Peptides, and Recombinant Proteins</b>                                               |                        |                                                                                                 |
| DEPC                                                                                               | Sigma                  | D5758                                                                                           |
| TriReagent                                                                                         | Sigma                  | 93289                                                                                           |
| Omniscript RT kit                                                                                  | Qiagen                 | 205111                                                                                          |
| Taq DNA polymerase                                                                                 | Qiagen                 | 201203                                                                                          |
| pGEM®-T Easy Vector Systems with JM109 Competent Cells                                             | Promega                | A1380                                                                                           |
| UTP-S35 radio-isotope                                                                              | PerkinElmer            | NEG739H001MC                                                                                    |
| Riboprobe combination system (SP6/T7)                                                              | Promega                | P1460                                                                                           |
| G-50 micro spin Columns                                                                            | GE Healthcare          | GE28-9034-08                                                                                    |
| AquaLight Beta scintillation cocktail                                                              | Gammadata              | 461-035                                                                                         |
| OCT embedding matrix                                                                               | CellPath               | KMA-0100-00Y                                                                                    |
| PFA                                                                                                | Sigma-Aldrich          | P6148                                                                                           |
| NaH <sub>2</sub> PO <sub>4</sub> (for PB buffer)                                                   | Sigma-Aldrich          | 04276                                                                                           |
| NaH <sub>2</sub> PO <sub>4</sub> 1H <sub>2</sub> O (for PB buffer)                                 | Sigma-Aldrich          | S9638                                                                                           |
| Acetic Anhydride                                                                                   | Sigma-Aldrich          | A604                                                                                            |
| Triethanolamine                                                                                    | Sigma-Aldrich          | T1502                                                                                           |
| NaOH                                                                                               | Sigma-Aldrich          | 71690                                                                                           |
| Ethanol 97%                                                                                        | VWR                    | 20823.362                                                                                       |
| Ethanol 99%                                                                                        | VWR                    | 20821.310                                                                                       |
| Formamide deionized                                                                                | Sigma-Aldrich          | F9037                                                                                           |
| Dextran sulphate                                                                                   | Sigma-Aldrich          | D8906                                                                                           |
| 50X Denhardts                                                                                      | Sigma-Aldrich          | 30915                                                                                           |
| Tris                                                                                               | Sigma-Aldrich          | T2694                                                                                           |
| DTT (10g)                                                                                          | Sigma-Aldrich          | D9779                                                                                           |
| 0.5M EDTA                                                                                          | Sigma-Aldrich          | E7789                                                                                           |
| tRNA                                                                                               | Roche                  | 10109525001                                                                                     |
| Tri Sodium citrate                                                                                 | Sigma-Aldrich          | C7254                                                                                           |
| NaCl                                                                                               | VWR                    | 27808.297                                                                                       |
| Rnase A                                                                                            | Sigma-Aldrich          | R5125                                                                                           |
| Autoradiography GBX developer                                                                      | Carestream             | P7042                                                                                           |
| Autoradiography GBX fixer                                                                          | Carestream             | P7167                                                                                           |
| Na-Heparin 5000IE/ ml                                                                              | LEO Pharma             | Lot: 16071809                                                                                   |
| <b>Critical Commercial Assays</b>                                                                  |                        |                                                                                                 |
| Testosterone ELISA kit                                                                             | MyBioSource            | MBS9711529                                                                                      |
| <b>Deposited Data</b>                                                                              |                        |                                                                                                 |
| Raw data, figure data, statistical tests, overview over experimental birds and riboprobe sequences | DataverseNO            | <a href="https://doi.org/10.18710/LUAHFK">https://doi.org/10.18710/LUAHFK</a>                   |
| <b>Experimental Models: Organisms/Strains</b>                                                      |                        |                                                                                                 |
| Svalbard rock ptarmigan ( <i>Lagopus muta hyperborea</i> )                                         | Own breeding/ Svalbard | N/A                                                                                             |
| <b>Oligonucleotides</b>                                                                            |                        |                                                                                                 |
| Primer for <i>in situ</i> hybridization synthesis                                                  | Sigma-Aldrich          | <a href="https://www.sigmaaldrich.com/norway.html">https://www.sigmaaldrich.com/norway.html</a> |
| Riboprobes for <i>in situ</i> hybridization (Ptarmigan specific)                                   | Own design             | <a href="https://doi.org/10.18710/LUAHFK">https://doi.org/10.18710/LUAHFK</a>                   |
| <b>Software and Algorithms</b>                                                                     |                        |                                                                                                 |



|                                        |                     |                                                                                                             |
|----------------------------------------|---------------------|-------------------------------------------------------------------------------------------------------------|
| GraphPad Prism 8                       | GraphPad Software   | <a href="https://www.graphpad.com/">https://www.graphpad.com/</a>                                           |
| ImageJ 1.51k                           | Wayne Rasband       | <a href="https://imagej.nih.gov/ij/">https://imagej.nih.gov/ij/</a>                                         |
| ActogramJ (plugin for ImageJ)          | Schmid et al., 2011 | <a href="https://bene51.github.io/">https://bene51.github.io/</a>                                           |
| ClockLab data acquisition software     | Actimetrics         | <a href="https://www.actimetrics.com/products/clocklab/">https://www.actimetrics.com/products/clocklab/</a> |
| <b>Other</b>                           |                     |                                                                                                             |
| Cryostat CM3050 S                      | Leica Biosystems    | 14047033534                                                                                                 |
| SupeFrost® Plus microscopic slides     | VWR                 | 631-0108                                                                                                    |
| Triathler liquid scintillation counter | Hidex               | 425-034                                                                                                     |
| V800 transmission scanner              | Epson               | EPSONV800                                                                                                   |
| BioMax® MR Film                        | Carestream          | Z350370-50EA                                                                                                |
| Passive infrared activity recorders    | Home-built          | N/A                                                                                                         |
| Actimetrics CL200 USB interface        | Actimetrics         | 06115                                                                                                       |
| Ptarmigan food                         | Fiskå Mølle AS      | 4120 TAU                                                                                                    |
| Fluorescent strip lights               | Osram               | L 58W 830 Lumilux                                                                                           |
| Northlight red light bulb, 15 lm       | Clas Ohlson         | 36-6557                                                                                                     |
| PL3000 analytical balance              | Mettler             | 612421                                                                                                      |
| Himac Centrifuge                       | Hitachi Koki        | CT15RE                                                                                                      |
| GloMax Explorer microplate reader      | Promega             | GM3500                                                                                                      |

224

225

## 226 RESOURCE AVAILABILITY

### 227 Lead contact

228 Further information and requests for resources and reagents should be directed to and will be fulfilled  
229 by the lead contacts, Alexander West ([alexander.west@uit.no](mailto:alexander.west@uit.no)) or David Hazlerigg  
230 ([david.hazlerigg@uit.no](mailto:david.hazlerigg@uit.no))

231

### 232 Materials Availability

233 Ptarmigan specific *in situ* hybridization riboprobes generated for this study are available upon request.

234

### 235 Data and Code Availability

236 All material and data generated during this study are available at DataverseNO  
237 <https://doi.org/10.18710/LUAHFK>.

238

239 **EXPERIMENTAL MODEL AND SUBJECT DETAILS**

240 This study was conducted on captive Svalbard ptarmigan (*Lagopus muta hyperborea*). The Svalbard  
241 ptarmigan is a subspecies of the Rock ptarmigan (*Lagopus muta*) and is a non-migratory and therefore  
242 permanent inhabitant of the high arctic archipelago of Svalbard (74 to 81 °N). Even though these birds  
243 are capable flyers they are isolated from other rock ptarmigan population, as reflected in their low  
244 genetic diversity [44] and the specificity of their phenotype compared to other ptarmigan populations,  
245 e.g. high amplitude body mass cycles [45].

246 Our facility located at the University of Tromsø operates a breeding program for Svalbard ptarmigan,  
247 which is regularly supplemented by birds caught in Svalbard. Experimental birds were hatched from  
248 eggs laid by captive Svalbard ptarmigan held in outside-aviaries. Hatching takes place between June  
249 and August in each breeding season and chicks are either raised outdoors on the ground or indoors at  
250 a photoperiod corresponding to the on- and offset of natural civil twilight in Tromsø (69° 39'N, 18°  
251 57'E). Birds used for our study were transferred into individual cages in light and temperature  
252 controlled rooms in September 2017 for the circadian experiment (Figure 1) and in September 2018  
253 for the skeleton photoperiod experiments (Figure 2 and 3). Birds of different sexes were housed  
254 together and each room held a maximum of twelve birds for the circadian experiment and a maximum  
255 of six bird for the skeleton photoperiod experiments. In both years, the initial photoperiod at transfer  
256 was L12:D12 which was thereafter gradually decreased to the respective photoperiodic treatments,  
257 which is L6:D18 for the circadian experiment and constant darkness (DD) for the skeleton photoperiod  
258 experiments. All birds were fed standardised protein food *ad libitum* (Fiskå Mølle) and provided with  
259 fresh water. Light was provided by fluorescent strip lights (Osram) delivering approximately 1000 lux  
260 at floor level. Permanent red light illumination (Clas Ohlson) was provided in order to allow husbandry  
261 in DD and outside the light hours.

262 Both sexes were used for the experiments as we have not seen any sex differences in hypothalamic  
263 gene expression in our previous study [3]. Seasonal rhythm in body mass, activity and food intake is  
264 also similar between the sexes [5, 25]. A full table with all birds with their respective experimental  
265 group and their respective data is available online at DataverseNO  
266 (<https://doi.org/10.18710/LUAHFK>).

267 All animals were kept in accordance of the EU directive 201/63/EU under licences provided by the  
268 Norwegian Food Safety authority (Mattilsynet, FOTS 7971 for the circadian experiment, FOTS 14209  
269 for the skeleton photoperiod experiments).

270

## 271 **METHOD DETAILS**

### 272 **Circadian experiment (Figure 1)**

273 Photoperiod was gradually decreased from September 2017 until reaching L6:D18 in mid-November  
274 2017. The circadian experiment took place on the 21st and 22nd December 2017. The experimental  
275 birds were divided into two groups. The short photoperiod group (SP-group, n = 20) was kept under  
276 L6:D18 while the constant light group (LL-group, n = 16) was directly transferred from L6:D18 into LL  
277 on the 21st December. Both groups were then sampled five times with an interval of five hours. The  
278 sampling times are given in Zeitgeber time (ZT) for the SP-group and CT for the LL-group and are as  
279 followed: ZT/ CT 3, 8, 13, 18 and 23 (ZT 0 corresponds to light-on switch for the SP-group). Birds were  
280 euthanized and brains were removed within five minutes. Brains were rapidly transferred onto a  
281 cooled metal block and ultimately stored at -80 °C until further processing. Brains from four birds were  
282 taken per sampling point. However, only three brains could be used for the CT 13 sampling point in  
283 the LL-group because one brain was damaged during the sampling procedure. ZT 3 was only sampled  
284 once and was used for plotting of both groups as there is no experimental difference between the  
285 groups at this point. ZT 3 was, however, excluded from the statistical analysis. All bird IDs and their  
286 corresponding sampling time points is available online at DataverseNO  
287 (<https://doi.org/10.18710/LUAHFK>).

288

### 289 **First skeleton-photoperiod experiment (Figure 2)**

290 Photoperiod was gradually decreased from September 2018 until reaching DD (dim red light) on the  
291 13th December 2018 in which they remained until the start of the experiment in the middle of January  
292 2019. On the 19th January 2019 all birds were transferred into L6:D18. This marked the start of this  
293 experiment, which lasted 12 weeks. The birds were divided into three groups. The SP control group (n  
294 = 10) remained under SP throughout the whole experiment (SP-group). The increasing photoperiod  
295 group (n = 12) was subjected to a stepwise increase in photoperiod (IP-group). The light-period was  
296 extended by shifting the light-off switch by two hours each week until reaching LL in week 10.  
297 Thereafter birds of this group remained in LL for two more weeks until the end of the experiment in  
298 week 12. The skeleton photoperiod group (n = 12) was subjected to a night break protocol in which  
299 the initial photoperiodic treatment of L6:D18 was split into two blocks of light from week 2 onwards  
300 (SkP-group). The first light-period of four hours remained fixed whereas the second light-period of two  
301 hours was shifted weekly backward by two hours. In week 10, the moving block of light joined with the  
302 start of the fixed light-period. At this point the light-period was not shifted further and the photoperiod  
303 was effectively L6:D18 again, yet shifted forward by two hours compared to the SP-group. Thereafter

304 birds of this group remained in L6:D18 for two more weeks until the end of the experiment in week  
305 12.

306 Body mass and voluntary food intake of all birds was measured weekly with an analytical scale  
307 (Mettler). VFI was measured once a week from all birds by measuring food eaten within a 24 hours  
308 period. In addition blood was taken weekly from four males per group for plasma testosterone  
309 measurements (blood was not taken in week 11 and 12). Locomotor activity of all experimental birds  
310 was continuously recorded as movement per minute by passive infrared sensors (home-built),  
311 mounted on the cage doors. Data were collected by an Actimetrics CL200 USB interface coupled to a  
312 PC with the ClockLab data acquisition software version 2.61 (Actimetrics).

313 All bird IDs and their respective photoperiodic treatment is available online at DataverseNO  
314 (<https://doi.org/10.18710/LUAHFK>).

315

### 316 **Second skeleton photoperiod experiment (Figure 3)**

317 The second skeleton photoperiod experiment was conducted with birds from the SP-group (n = 10)  
318 from the first skeleton photoperiod experiment. This experiment started on 4th April 2019. The birds  
319 were separated into two groups. The SP-group (n = 5) further remained under L6:D18 for eight weeks  
320 and where sampled at the end of the experiment. The SkP-group (n = 5) went through a similar shifting  
321 skeleton photoperiod as described in the previous experiment. However, the two hour light-period  
322 was only shifted until reaching ZT 14-16 in week 6 upon which point birds remained on L4:D10:L2:D8  
323 for additional two weeks before they were sampled (ZT 0 corresponds to the lights-on switch from the  
324 fixed four hour light-period). All birds of this experiment were euthanised on week 8 between ZT 0.5  
325 and ZT 1.5. After the euthanasia brains were removed and rapidly transferred onto a cooled metal  
326 block until ultimately stored at -80 °C.

327 Measurements of BM, VFI and activity and blood sampling was conducted in the same manner as in  
328 the first skeleton photoperiod experiment and all bird IDs with their respective photoperiodic  
329 treatment is available online at DataverseNO (<https://doi.org/10.18710/LUAHFK>).

330

### 331 **Hormone measurement**

332 Blood was taken weekly from four male birds of every group. In the first skeleton experiment, four  
333 birds were sampled in each group and each week, except in DD and week 1, in which only a total of  
334 four birds were sampled. The data from DD and week 1 was used to plot all groups but was excluded

335 from statistical analysis. In the second skeleton photoperiod experiment, two male birds were sampled  
336 in each group and each week. Up to 1 ml of blood was taken with heparinized (LEO Pharma) syringes  
337 and transferred into 1.5 ml Eppendorf tubes stored on ice. Within 30 minutes, the blood was  
338 centrifuged at 3.000 rpm at 4 °C for 15 minutes (Hitachi Koki). After centrifugation, the plasma was  
339 pipetted from the sample and transferred into 60 µl aliquots. The aliquots were frozen at -80 °C until  
340 further processing.

341 Plasma Testosterone concentration was measured with a competitive inhibition ELISA kit  
342 (MyBioSource) following the manufacture's manual. Optical density was measured by a microplate  
343 reader (Promega) at 450 nm.

344

#### 345 **cDNA cloning and *in situ* hybridization**

346 Gene expression of seasonal and clock genes in the PT and MBH for the circadian and second skeleton  
347 photoperiod experiment was measured by radioactive *in situ* hybridization. All *in situ* hybridization  
348 probes (*Tshβ*, *Dio2*, *Dio3*, *Per2* and *Cry1*) are based on RNA extracted from Svalbard ptarmigan brain  
349 tissue and were designed using a Icelandic ptarmigan genome [46]. Brain cryo-sectioning, probe  
350 synthesis and *in situ* hybridization were performed as reported previously [3, 47] and are described in  
351 short as follows.

352 RNA from Svalbard ptarmigan brain samples was extracted using TriReagent (Sigma-Aldrich) and the  
353 extracted RNA was converted into cDNA using the Omniscript RT kit from Qiagen. Subsequent PCR was  
354 performed with primers (Sigma-Aldrich) based on the Icelandic rock ptarmigan genome and Taq DNA  
355 polymerase (Qiagen). Correct sized PCR products were extracted, cloned into pGEMT easy vectors  
356 (Promega), sequenced and verified against the reference genome. Riboprobe sequences are available  
357 online at DataverseNO (<https://doi.org/10.18710/LUAHFK>).

358 Vectors were linearized and transcribed with a Promega T7/ SP6 Riboprobe combination system in  
359 combination with a 35S-UTP isotope (PerkinElmer). Radioactively labelled riboprobes were  
360 subsequently purified with G-50 micro spin columns (GE healthcare) and incorporation of the  
361 radionucleotide into the riboprobe was measured as counts per minute by a liquid scintillation counter  
362 (Hidex, scintillation cocktail form Gammadata).

363 Frozen brains, which were cryo-sectioned (Leica Biosystems) and mounted unto pre-coated adhesion  
364 microscopic slides (VWR), were fixed in 4 % PFA (in 0.1 M PB) for 20 minutes on ice. Sections were  
365 rinsed twice with 0.1 M PB for 5 minutes after fixation. Next sections were acetylated with 3.75 % v/v  
366 of acetic anhydride in 0.1 M triethanolamine buffer (0.05 N NaOH). Slides were rinsed twice with 0.1

367 M PB for 5 minutes after acetylation, dehydrated with stepwise increasing ethanol solutions (50 %, 70  
368 %, 96 %, 100 % for 3 minutes each) and dried under vacuum for at least 1 hour. Dried sections were  
369 hybridized overnight at 56°C with radioactively labelled riboprobe in hybridization buffer (50 %  
370 deionised formamide, 10 % dextran sulfate, 1 x Denhardt's solution, 300 mM NaCl, 10 mM Tris, 10 mM  
371 DTT, 1 mM EDTA, 500 µg/ml tRNA). The amount of added riboprobe equals 10<sup>6</sup> counts per minute for  
372 each microscopic slide. Hybridized sections were washed with 4 x saline sodium citrate (SSC) solutions  
373 (3 x 5 minutes) and treated with RNase-A solution (20 µg/ml RNase A, 500 mM NaCl, 1 mM Tris, 1 mM  
374 EDTA) for 30 minutes at 37 °C. After RNase-A treatment stringency washes were performed with SSC  
375 of decreasing concentration: 2 x SSC (2 x 5 minutes), 1 x SSC (1 x 10 minutes), 0.5 x SSC (1 x 10 minutes),  
376 0.1 x SSC (30 minutes at 60°C), 0.1 x SSC (rinse). SSC solutions were each supplemented with 1 mM  
377 DTT.

378 After stringency washing slides were dehydrated in stepwise increasing ethanol solutions (50 %, 70 %, 96 %, 100 % for 3 minutes each) and dried under vacuum. Once sections were dry, they were exposed  
379 to autoradiographic films (Carestream) for 10 to 25 days. Exposed films were developed (Carestream),  
380 fixed (Carestream) and digitalised with an transmission scanner (Epson). Optical density (OD) was  
381 measured with ImageJ (Wayne Rasband).  
382

383

#### 384 **QUANTIFICATION AND STATISTICAL ANALYSIS**

385 All graphs and statistical tests were prepared in GraphPad Prism (Version 8.3.0, San Diego, CA, USA).  
386 Seasonal and clock gene expression of the circadian experiment was analysed with 2-way ANOVA with  
387 *post hoc* Sidak's multiple comparisons test (Figure 1D-E). 2-way ANOVA with *post hoc* Tukey's multiple  
388 comparisons test was used to examine changes in body mass, activity (in activity/ day and in activity/  
389 day divided by the photoperiod in h), plasma testosterone and food intake in the first skeleton-  
390 photoperiod experiment (Figure 2B-E and S1). Activity, body mass, food intake and plasma  
391 testosterone of the second skeleton photoperiod experiment was analysed by 2-way ANOVA with *post*  
392 *hoc* Sidak's multiple comparison test (Figure S2). Relative gene expression between the SP-group and  
393 SkP-group of the second skeleton photoperiod experiment was tested with unpaired t-tests. Activity  
394 was normalized by dividing counts per minute of each bird by its 99<sup>th</sup> percentile and actograms (Figure  
395 2A, 3A and S3) were plotted with ActogramJ [48], a plugin for ImageJ (Wayne Rasband).

396 Results of statistical tests are available online at DataverseNO (<https://doi.org/10.18710/LUAHFK>).

397

398 **SUPPLEMENTAL INFORMATION**

399

400 **Figure S1. Response in body mass and food intake to increasing and skeleton photoperiod.**

401 (A) Weekly body mass and is displayed as mean  $\pm$  SEM

402 (B) Weekly voluntary food intake measured as grams of food eaten in a 24-h period. Data is  
403 presented as mean  $\pm$  SEM.

404

405 **Figure S2. Physiological and endocrine responses in the second skeleton photoperiod experiment.**

406 (A) Activity measured as counts/ day and displayed as mean  $\pm$  SEM

407 (B) Weekly body mass is displayed as mean  $\pm$  SEM.

408 (C) Weekly body mass changes displayed as mean  $\pm$  SEM.

409 (D) Weekly voluntary food intake measured as grams eaten in a 24-h period and displayed as mean  $\pm$   
410 SEM.

411 (E) Weekly plasma testosterone in male birds measured in ng/ml and displayed as mean  $\pm$  SEM.

412

413 **Figure S3. Double plotted actograms of all experimental birds of the skeleton photoperiod  
414 experiments.**

415 (A) Actograms correspond to experimental design of Figure 2A

416 (B) Actograms correspond to experimental design of Figure 3A

417

418

419

420

421     **REFERENCES**

- 422     1.     Reierth, E., and Stokkan, K.-A. (1998). Activity rhythm in High Arctic Svalbard ptarmigan  
423           (Lagopus mutus hyperboreus). *Canadian journal of zoology* *76*, 2031-2039.
- 424     2.     van Oort, B.E., Tyler, N.J., Gerkema, M.P., Folkow, L., and Stokkan, K.-A. (2007). Where clocks  
425           are redundant: weak circadian mechanisms in reindeer living under polar photic conditions.  
426           *Naturwissenschaften* *94*, 183-194.
- 427     3.     Appenroth, D., Melum, V.J., West, A.C., Dardente, H., Hazlerigg, D.G., and Wagner, G.C. (2020).  
428           Photoperiodic induction without light-mediated circadian entrainment in a high arctic resident  
429           bird. *Journal of Experimental Biology*.
- 430     4.     van Oort, B.E., Tyler, N.J., Gerkema, M.P., Folkow, L., Blix, A.S., and Stokkan, K.-A. (2005).  
431           Circadian organization in reindeer. *Nature* *438*, 1095-1096.
- 432     5.     Lindgård, K., and Stokkan, K.-A. (1989). Daylength control of food intake and body weight in  
433           Svalbard ptarmigan *Lagopus mutus hyperboreus*. *Ornis Scandinavica*, 176-180.
- 434     6.     Stokkan, K.-A., Sharp, P.J., Dunn, I.C., and Lea, R.W. (1988). Endocrine changes in  
435           photostimulated willow ptarmigan (*Lagopus lagopus lagopus*) and Svalbard ptarmigan  
436           (*Lagopus mutus hyperboreus*). *General and comparative endocrinology* *70*, 169-177.
- 437     7.     Stokkan, K.-A., Lindgård, K., and Reierth, E. (1995). Photoperiodic and ambient temperature  
438           control of the annual body mass cycle in Svalbard ptarmigan. *Journal of Comparative*  
439           *Physiology B* *165*, 359-365.
- 440     8.     Yoshimura, T., Yasuo, S., Watanabe, M., Iigo, M., Yamamura, T., Hirunagi, K., and Ebihara, S.  
441           (2003). Light-induced hormone conversion of T<sub>4</sub> to T<sub>3</sub> regulates photoperiodic response of  
442           gonads in birds. *Nature* *426*, 178.
- 443     9.     Elliott, J.A., Stetson, M.H., and Menaker, M. (1972). Regulation of testis function in golden  
444           hamsters: a circadian clock measures photoperiodic time. *Science* *178*, 771-773.
- 445     10.    Follett, B., and Sharp, P. (1969). Circadian rhythmicity in photoperiodically induced  
446           gonadotrophin release and gonadal growth in the quail. *Nature* *223*, 968.
- 447     11.    Follett, B.K., Kumar, V., and Juss, T.S. (1992). Circadian nature of the photoperiodic clock in  
448           Japanese quail. *Journal of Comparative Physiology A* *171*, 533-540.
- 449     12.    Gwinner, E., and Eriksson, L.-O. (1977). Circadiane Rhythmik und photoperiodische  
450           Zeitmessung beim Star (*Sturnus vulgaris*) Circadian rhythms and photoperiodic time  
451           measurement in the starling (*Sturnus vulgaris*). *Journal für Ornithologie* *118*, 60-67.
- 452     13.    Hamner, W., and Enright, J. (1967). Relationships between photoperiodism and circadian  
453           rhythms of activity in the house finch. *Journal of experimental Biology* *46*, 43-61.
- 454     14.    Pittendrigh, C.S. (1972). Circadian surfaces and the diversity of possible roles of circadian  
455           organization in photoperiodic induction. *Proceedings of the National Academy of Sciences* *69*,  
456           2734-2737.
- 457     15.    Lincoln, G., Messenger, S., Andersson, H., and Hazlerigg, D. (2002). Temporal expression of  
458           seven clock genes in the suprachiasmatic nucleus and the pars tuberalis of the sheep: evidence  
459           for an internal coincidence timer. *Proceedings of the National Academy of Sciences* *99*, 13890-  
460           13895.
- 461     16.    Dardente, H., Wyse, C.A., Birnie, M.J., Dupré, S.M., Loudon, A.S., Lincoln, G.A., and Hazlerigg,  
462           D.G. (2010). A molecular switch for photoperiod responsiveness in mammals. *Current Biology*  
463           *20*, 2193-2198.
- 464     17.    Masumoto, K.-h., Ukai-Tadenuma, M., Kasukawa, T., Nagano, M., Uno, K.D., Tsujino, K.,  
465           Horikawa, K., Shigeyoshi, Y., and Ueda, H.R. (2010). Acute induction of *Eya3* by late-night light  
466           stimulation triggers TSH $\beta$  expression in photoperiodism. *Current Biology* *20*, 2199-2206.
- 467     18.    Nakao, N., Ono, H., Yamamura, T., Anraku, T., Takagi, T., Higashi, K., Yasuo, S., Katou, Y.,  
468           Kageyama, S., and Uno, Y. (2008). Thyrotrophin in the pars tuberalis triggers photoperiodic  
469           response. *Nature* *452*, 317-322.
- 470     19.    Yasuo, S., Watanabe, M., Nakao, N., Takagi, T., Follett, B.K., Ebihara, S., and Yoshimura, T.  
471           (2005). The reciprocal switching of two thyroid hormone-activating and-inactivating enzyme



- 472 genes is involved in the photoperiodic gonadal response of Japanese quail. *Endocrinology* *146*,  
473 2551-2554.
- 474 20. Ono, H., Nakao, N., Yamamura, T., Kinoshita, K., Mizutani, M., Namikawa, T., Iigo, M., Ebihara,  
475 S., and Yoshimura, T. (2009). Red jungle fowl (*Gallus gallus*) as a model for studying the  
476 molecular mechanism of seasonal reproduction. *Animal science journal* *80*, 328-332.
- 477 21. Agarwal, N., Mishra, I., Komal, R., Rani, S., and Kumar, V. (2017). Circannual testis and moult  
478 cycles persist under photoperiods that disrupt circadian activity and clock gene cycles in  
479 spotted munia. *Journal of Experimental Biology* *220*, 4162-4168.
- 480 22. Srivastava, A., Trivedi, N., Malik, S., Rani, S., and Kumar, V. (2015). Molecular basis of  
481 photoperiodic control of reproductive cycle in a subtropical songbird, the Indian weaver bird  
482 (*Ploceus philippinus*). *General and comparative endocrinology* *220*, 41-45.
- 483 23. Trivedi, A.K., Sur, S., Sharma, A., Taufique, S.T., Gupta, N.J., and Kumar, V. (2019). Temperature  
484 alters the hypothalamic transcription of photoperiod responsive genes in induction of seasonal  
485 response in migratory redheaded buntings. *Molecular and cellular endocrinology* *493*, 110454.
- 486 24. Bünning, E. (1936). Die endogene Tagesrhythmik als Grundlage der photoperiodischen  
487 Reaktion. *Ber. dtsh. Botan. Ges* *54*, 590-607.
- 488 25. Lindgård, K., Stokkan, K., and Näslund, S. (1995). Annual changes in body mass in captive  
489 Svalbard ptarmigan: role of changes in locomotor activity and food intake. *Journal of*  
490 *Comparative Physiology B* *165*, 445-449.
- 491 26. Wingfield, J.C., and Hahn, T.P. (1994). Testosterone and territorial behaviour in sedentary and  
492 migratory sparrows. *Animal Behaviour* *47*, 77-89.
- 493 27. Wacker, D.W., Wingfield, J.C., Davis, J.E., and Meddle, S.L. (2010). Seasonal changes in  
494 aromatase and androgen receptor, but not estrogen receptor mRNA expression in the brain of  
495 the free-living male song sparrow, *Melospiza melodia morphna*. *Journal of Comparative*  
496 *Neurology* *518*, 3819-3835.
- 497 28. Takahashi, J.S., and Menaker, M. (1982). Entrainment of the circadian system of the house  
498 sparrow: a population of oscillators in pinealectomized birds. *Journal of comparative*  
499 *physiology* *146*, 245-253.
- 500 29. Stokkan, K.A., Van Oort, B.E., Tyler, N.J., and Loudon, A.S. (2007). Adaptations for life in the  
501 Arctic: evidence that melatonin rhythms in reindeer are not driven by a circadian oscillator but  
502 remain acutely sensitive to environmental photoperiod. *Journal of pineal research* *43*, 289-  
503 293.
- 504 30. Lu, W., Meng, Q.-J., Tyler, N.J., Stokkan, K.-A., and Loudon, A.S. (2010). A circadian clock is not  
505 required in an arctic mammal. *Current Biology* *20*, 533-537.
- 506 31. Long, R.A., Martin, T.J., and Barnes, B.M. (2005). Body temperature and activity patterns in  
507 free-living arctic ground squirrels. *Journal of Mammalogy* *86*, 314-322.
- 508 32. Williams, C.T., Barnes, B.M., and Buck, C.L. (2011). Daily body temperature rhythms persist  
509 under the midnight sun but are absent during hibernation in free-living arctic ground squirrels.  
510 *Biology letters*, rsbl20110435.
- 511 33. Stelzer, R.J., and Chittka, L. (2010). Bumblebee foraging rhythms under the midnight sun  
512 measured with radiofrequency identification. *BMC biology* *8*, 93.
- 513 34. Ware, J.V., Rode, K.D., Robbins, C.T., Leise, T., Weil, C.R., and Jansen, H.T. (2020). The Clock  
514 Keeps Ticking: Circadian Rhythms of Free-Ranging Polar Bears. *J Biol Rhythms*,  
515 748730419900877.
- 516 35. Hüppe, L., Payton, L., Last, K., Wilcockson, D., Ershova, E., and Meyer, B. (2020). Evidence for  
517 oscillating circadian clock genes in the copepod *Calanus finmarchicus* during the summer  
518 solstice in the high Arctic. *Biology Letters* *16*, 20200257.
- 519 36. Marshall, A. (1938). Bird and animal activity in the arctic. *The Journal of Animal Ecology*, 248-  
520 250.
- 521 37. Karplus, M. (1952). Bird activity in the continuous daylight of arctic summer. *Ecology* *33*, 129-  
522 134.

- 523 38. Steiger, S.S., Valcu, M., Spoelstra, K., Helm, B., Wikelski, M., and Kempenaers, B. (2013). When  
524 the sun never sets: diverse activity rhythms under continuous daylight in free-living arctic-  
525 breeding birds. *Proceedings of the Royal Society B: Biological Sciences* 280, 20131016.
- 526 39. Hazlerigg, D.G., and Tyler, N.J. (2019). Activity patterns in mammals: Circadian dominance  
527 challenged. *PLoS biology* 17, e3000360.
- 528 40. Simpson, S., and Follett, B. (1982). Formal properties of the circadian rhythm of locomotor  
529 activity in Japanese quail. *Journal of comparative physiology* 145, 391-398.
- 530 41. Wada, M. (1986). Circadian rhythms of testosterone-dependent behaviors, crowing and  
531 locomotor activity, in male Japanese quail. *Journal of Comparative Physiology A* 158, 17-25.
- 532 42. Follett, B., and Milette, J. (1982). Photoperiodism in quail: testicular growth and maintenance  
533 under skeleton photoperiods. *Journal of Endocrinology* 93, 83-90.
- 534 43. Follett, B. (1981). The stimulation of luteinizing hormone and follicle-stimulating hormone  
535 secretion in quail with complete and skeleton photoperiods. *General and comparative  
536 endocrinology* 45, 306-316.
- 537 44. Sahlman, T., Segelbacher, G., and Hoglund, J. (2009). Islands in the ice: colonisation routes for  
538 rock ptarmigan to the Svalbard archipelago. *Ecography* 32, 840-848.
- 539 45. Stokkan, K.-A. (1992). Energetics and adaptations to cold in ptarmigan in winter. *Ornis  
540 Scandinavica*, 366-370.
- 541 46. Kozma, R., Melsted, P., Magnússon, K.P., and Höglund, J. (2016). Looking into the past—the  
542 reaction of three grouse species to climate change over the last million years using whole  
543 genome sequences. *Molecular ecology* 25, 570-580.
- 544 47. Lomet, D., Cognié, J., Chesneau, D., Dubois, E., Hazlerigg, D., and Dardente, H. (2018). The  
545 impact of thyroid hormone in seasonal breeding has a restricted transcriptional signature.  
546 *Cellular and molecular life sciences* 75, 905-919.
- 547 48. Schmid, B., Helfrich-Förster, C., and Yoshii, T. (2011). A new ImageJ plug-in “ActogramJ” for  
548 chronobiological analyses. *Journal of biological rhythms* 26, 464-467.

549

550

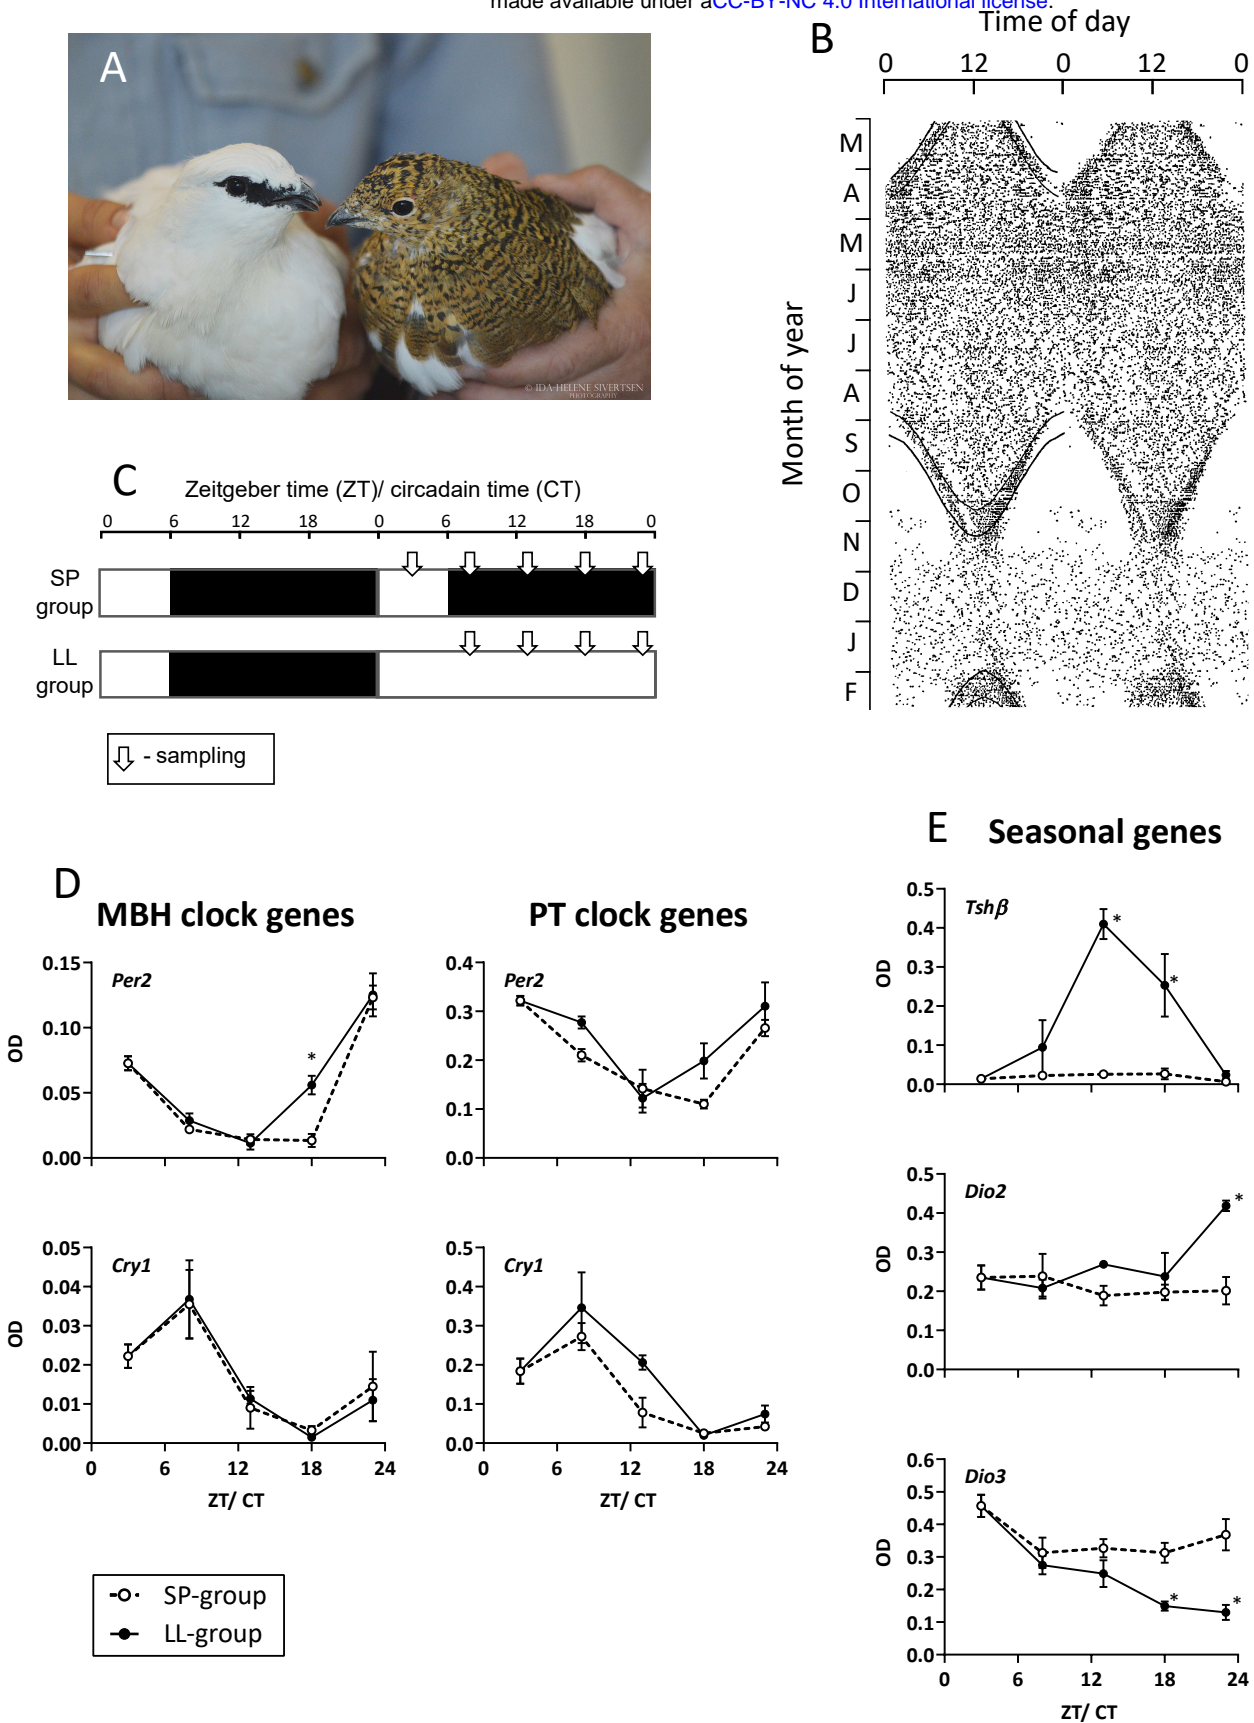

Figure 1.

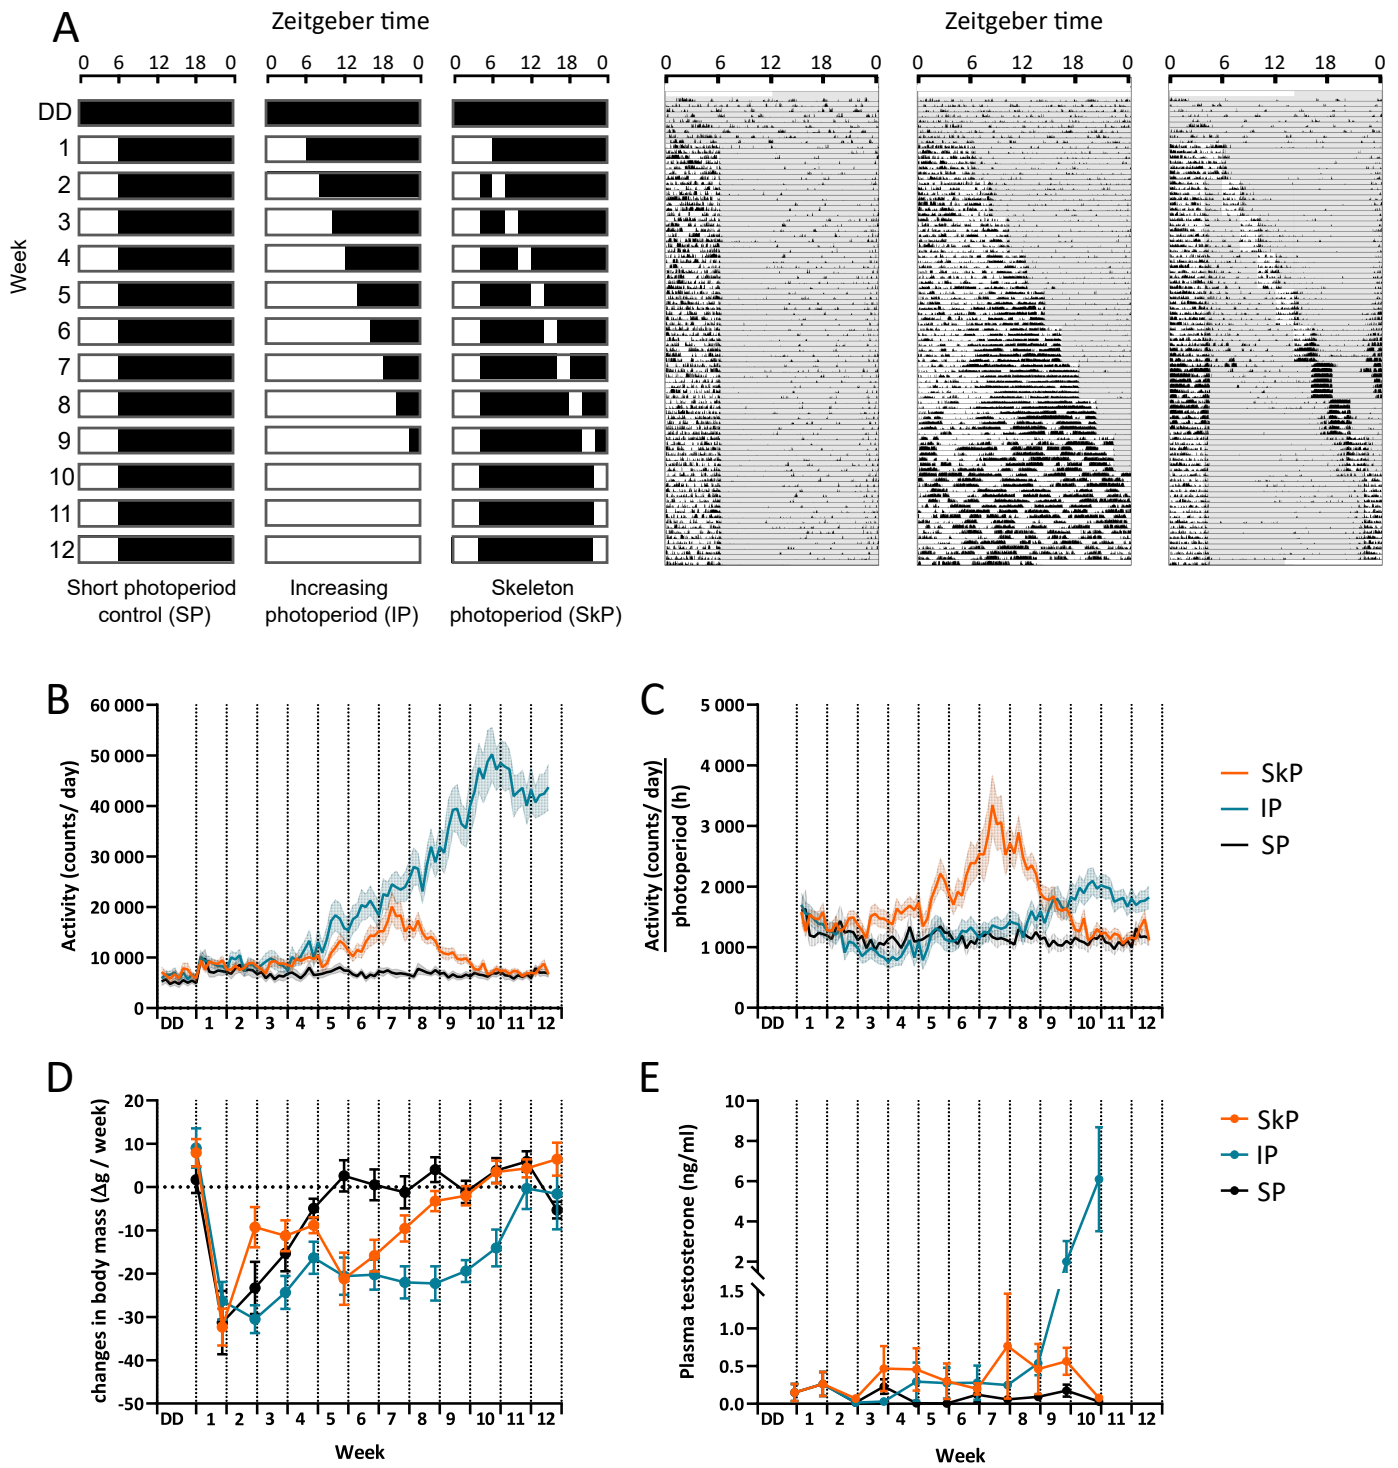

Figure 2.

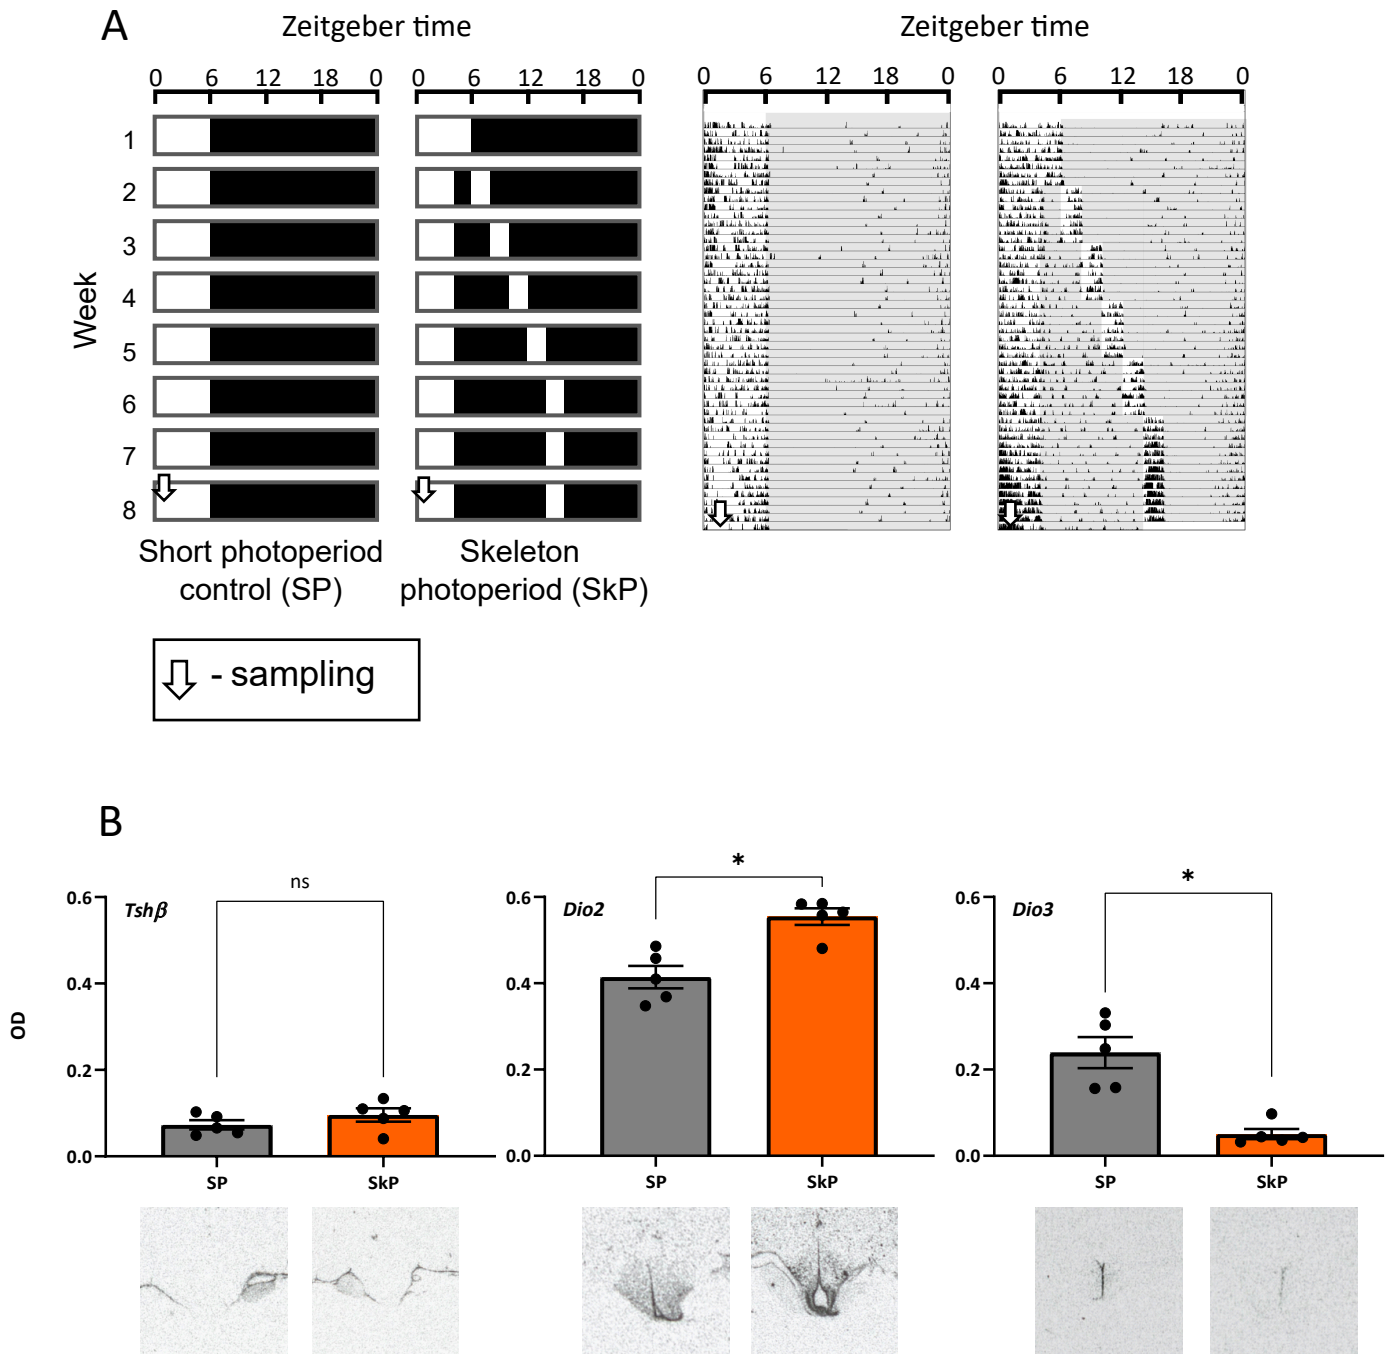

Figure 3.

## Japanese Quail

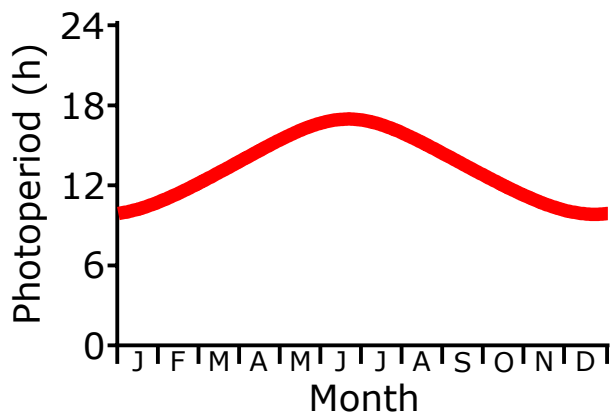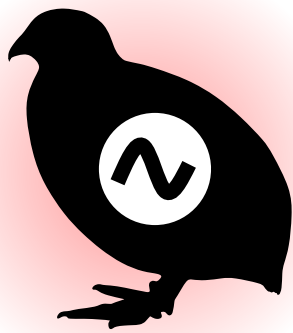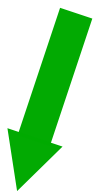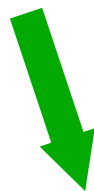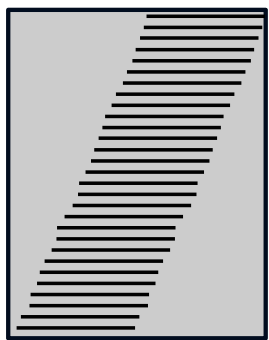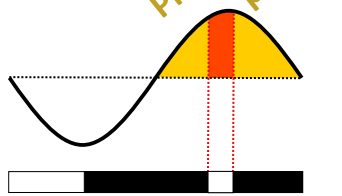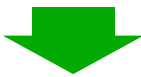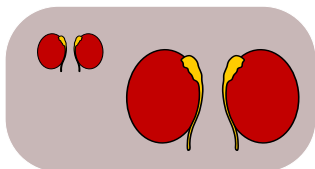

## Svalbard Ptarmigan

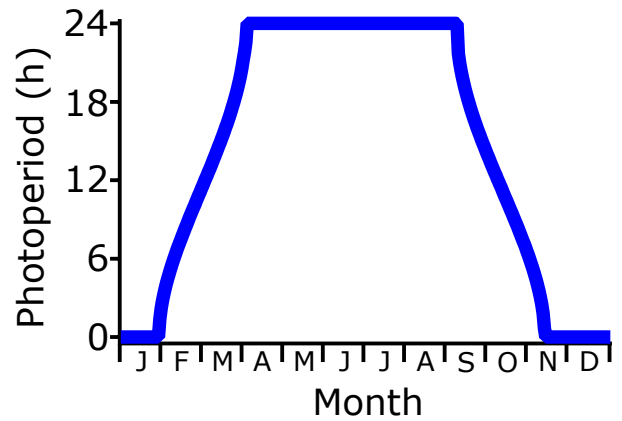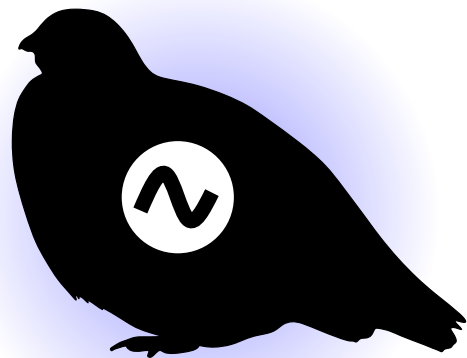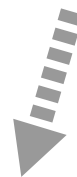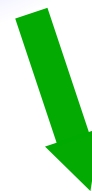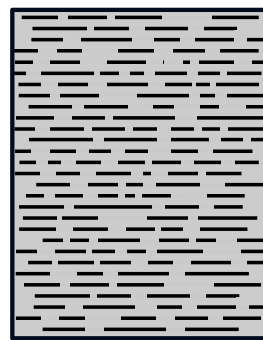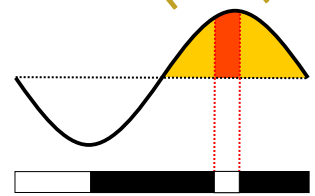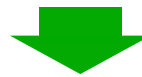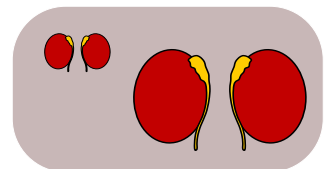

Figure 4.
